# Supplementary material for: A Machine Learning Workflow of Multiplexed Immunofluorescence Images to Interrogate Activator and Tolerogenic Profiles of Conventional Type 1 Dendritic Cells Infiltrating Melanomas of Disease-Free and Metastatic Patients
Source: Hindawi journal article supplement (doi:10.1155/2022/9775736), 2022-10-12
Supplement: f1 [file 9775736.f1.pdf]

Supplementary Materials

Table S1. Data set for Manual Annotation.

| <b>Image</b>  | <b>Time of annotation</b> | <b>Nuclei annotated</b> |
|---------------|---------------------------|-------------------------|
| <b>5017-1</b> | 3 h 40 min                | 1560                    |
| <b>2242-1</b> | 3 h 04 min                | 1354                    |
| <b>8464-3</b> | 4 h 15 min                | 1748                    |
| <b>6090-1</b> | 5 h 30 min                | 2184                    |
| <b>1628-1</b> | 6 h 05 min                | 2501                    |
| <b>1134-2</b> | 4 h 10 min                | 1774                    |
| <b>5835-2</b> | 5 h 50 min                | 2406                    |
| <b>7737-1</b> | 5 h 12 min                | 1792                    |
| <b>9337-3</b> | 5 h 00 min                | 1805                    |
| <b>2405-3</b> | 1 h 17 min                | 648                     |
| <b>0101-3</b> | 2 h 00 min                | 1039                    |
| <b>0900-1</b> | 1 h 00 min                | 469                     |

Table S2. Comparison between Annotater and QuPath

|                  | <b>Advantages</b>                                                                                                                                                                                                                                                                | <b>Disadvantages</b>                                                                                                                                                                                                                                                                            |
|------------------|----------------------------------------------------------------------------------------------------------------------------------------------------------------------------------------------------------------------------------------------------------------------------------|-------------------------------------------------------------------------------------------------------------------------------------------------------------------------------------------------------------------------------------------------------------------------------------------------|
| <b>Annotater</b> | <ul style="list-style-type: none"> <li>Integrated with ImageJ.</li> <li>Do not need programming skills.</li> <li>Training of classifiers is intuitive.</li> <li>Obtaining the results is an integrated function.</li> </ul>                                                      | <ul style="list-style-type: none"> <li>The time spent in the batch analysis is longer than QuPath.</li> </ul>                                                                                                                                                                                   |
| <b>QuPath</b>    | <ul style="list-style-type: none"> <li>Automated analysis is easier to implement.</li> <li>The time spent in the batch analysis is shorter than the Annotator.</li> <li>Optimal visualization of markers.</li> <li>There are different options to normalize the data.</li> </ul> | <ul style="list-style-type: none"> <li>Need programming scripting skills.</li> <li>Only StarDist could be integrated to segment nuclei.</li> <li>Different masks of segmented nuclei requires different treatments</li> <li>Training of classifiers is less intuitive than Annotator</li> </ul> |

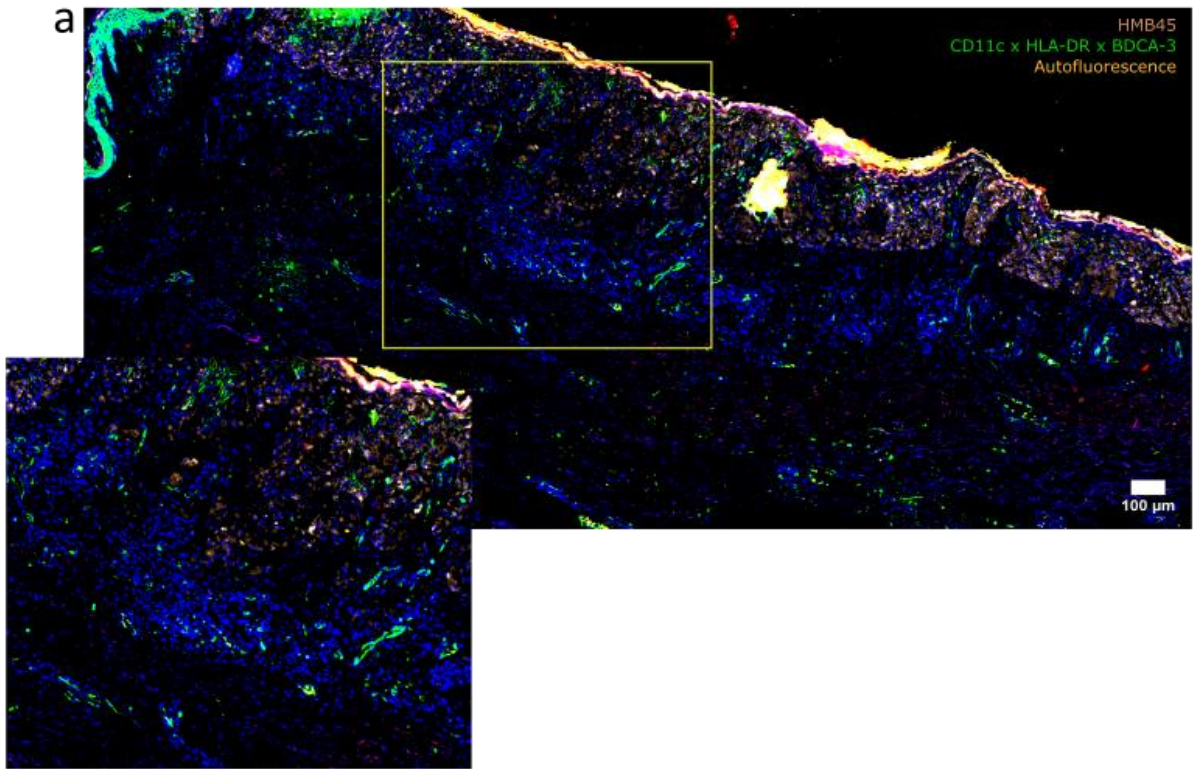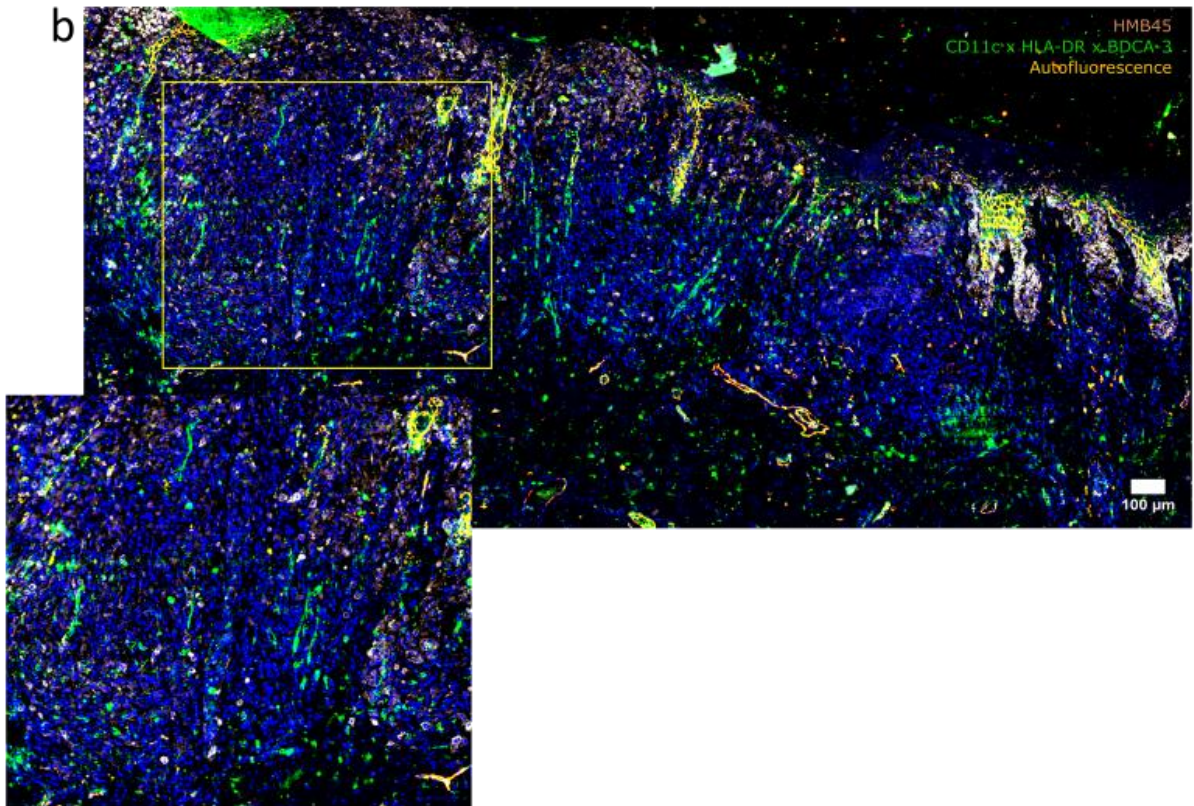

**Supplementary figure 1. Expanded view of melanoma samples showing the distribution of cDC1s.** Slide scanning of an expanded region of melanomas from a patient (a) metastatic at diagnosis and (b) disease free showing the distribution of cDC1 (green) respect to the tumor cell (HMB45pos-sepia). cDC1 were identified using CD11c, HLA-DR and BDCA3, these signals were treated mathematically to show only the areas of coincidence in green. The squares in yellow are areas magnified (below).

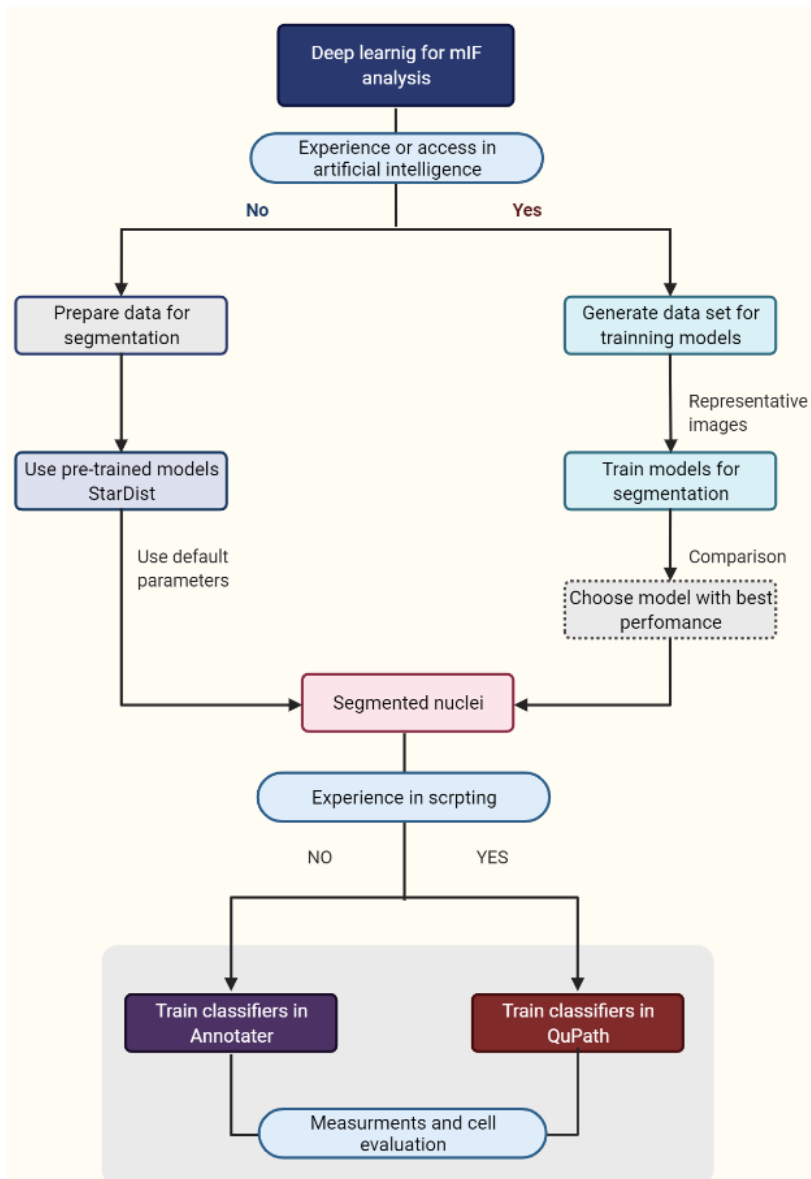

**Supplementary Figure 2.** A schematic diagram for decision-making to implement a deep learning-based workflow of image analysis.

Supplementary Video 1. Example of detections by machine learning classifier per each marker with Annotater.

[https://drive.google.com/file/d/19jY3PnVd36EuP\\_Qdc1\\_Eb0ifyPQcmul9/view?usp=sharing](https://drive.google.com/file/d/19jY3PnVd36EuP_Qdc1_Eb0ifyPQcmul9/view?usp=sharing)
